# Supplementary material for: Association of branched-chain fatty acids with metabolic syndrome: a systematic review and meta-analysis of observational studies
Source: Royal Society of Chemistry journal article supplement (doi:10.1039/d3fo01320k), 2023-01-01
Supplement: d3fo01320k1.pdf [file d3fo01320k1.pdf]

# Association of branched-chain fatty acids with metabolic syndrome: a systematic review and meta-analysis of observational studies

Yuan He<sup>1</sup>, Xin-Hui-Zi Hong<sup>1</sup>, Meng Xu<sup>1</sup>, Yuan-Fa Liu<sup>1,2</sup>, Yong-Jiang Xu<sup>1\*</sup>

## **Author Affiliations:**

1. State Key Laboratory of Food Science and Technology, School of Food Science and Technology, National Engineering Research Center for Functional Food, National Engineering Laboratory for Cereal Fermentation Technology, Collaborative Innovation Center of Food Safety and Quality Control in Jiangsu Province, Jiangnan University, No. 1800, Lihu Road, Wuxi 214122, Jiangsu, People's Republic of China.
2. Future Food (Bai Ma) Research Institute.

## **\*Corresponding author:**

Tel: +086-510-853262

E-mail address: yjxutju@gmail.com (J.Y Xu);

Full postal address: School of Food Science and Technology, Jiangnan University,  
No.1800 Lihu Road, Binhu District, Wuxi 214122, China

---

**Supplementary information list:**

Fig S1. Funnel plot and Egger's regression test for association between MetS and (A) tissue/serum BCFAs. (B) fecal BCFAs.

Fig S2. (A) Sensitivity analysis of studies on the association of fecal BCFAs with MetS. (B) Forest plot after exclusion of literature causing high heterogeneity.

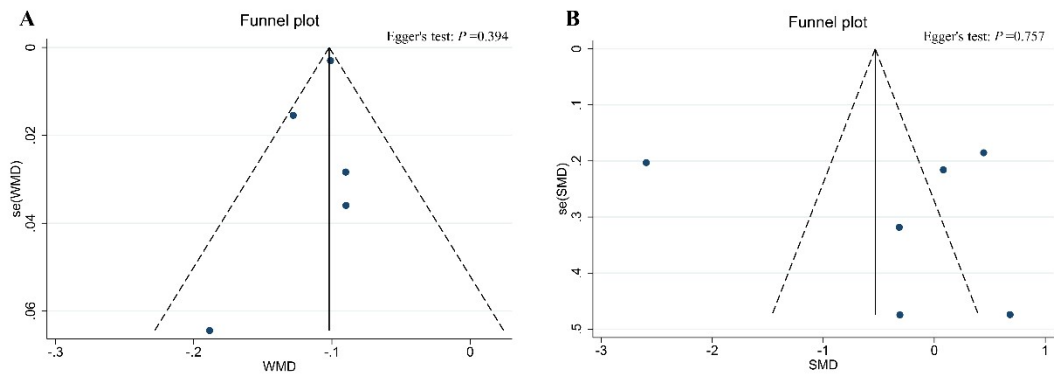

Fig S2. Funnel plot and Egger's regression test for association between MetS and (A) tissue/serum BCFAs. (B) fecal BCFAs.

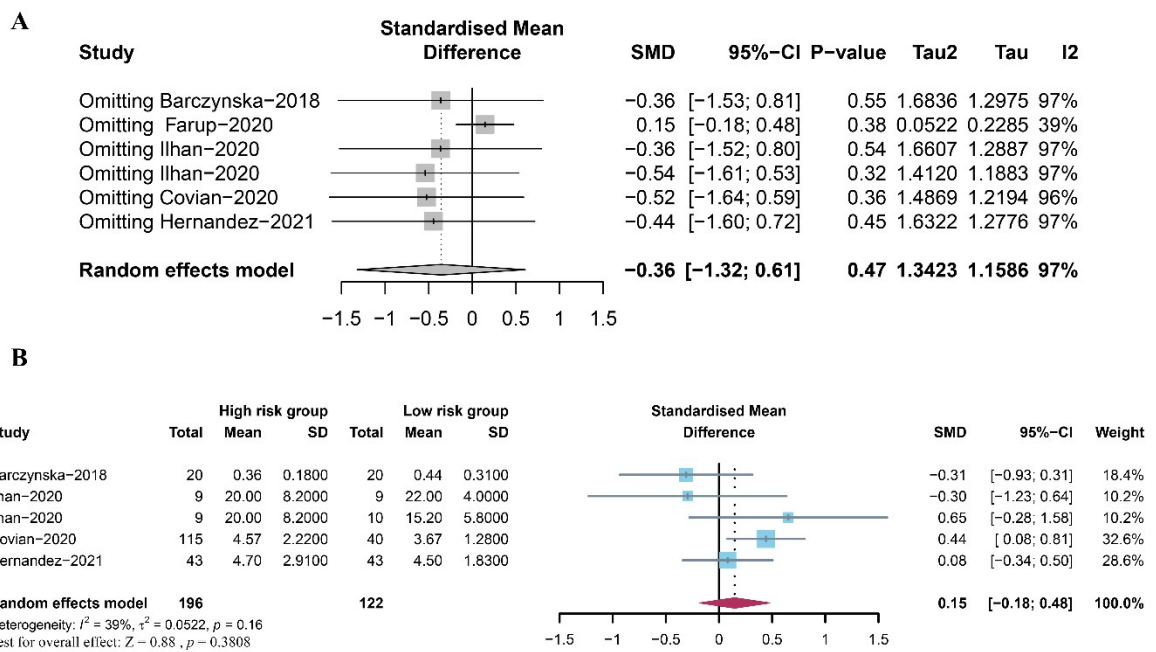

Fig S2. (A) Sensitivity analysis of studies on the association of fecal BCFAs with MetS. (B) Forest plot after exclusion of literature causing high heterogeneity.
