# Supplementary material for: Association of branched-chain fatty acids with metabolic syndrome: a systematic review and meta-analysis of observational studies
Source: Royal Society of Chemistry journal article supplement (doi:10.1039/d3fo01320k), 2023-01-01
Supplement: d3fo01320k2.xlsx [file d3fo01320k2.xlsx]

## Sheet: Table List
Sheet	Description
Table S1	Literature search record
Table S2	Agency for Health Care Research and Quality (AHRQ) quality assessment summary
Table S3	Newcastle-Ottawa Scale (NOS) quality assessment summary
Table S4	Elaboration of the biological properties of BCFAs.

## Sheet: Table S1
Table S1. Literature search record
Search number	Query	Search Details	Results	Time
9	#1 OR #2 OR #3 OR #4 OR #5 OR #6 OR #7 AND #8	((("branch"[All Fields] OR "branch s"[All Fields] OR "branche"[All Fields] OR "branched"[All Fields] OR "branches"[All Fields] OR "branching"[All Fields] OR "branchings"[All Fields] OR "branchs"[All Fields]) AND ("chain"[All Fields] OR "chain s"[All Fields] OR "chains"[All Fields]) AND ("fatty acids"[MeSH Terms] OR ("fatty"[All Fields] AND "acids"[All Fields]) OR "fatty acids"[All Fields] OR ("fa…	1396	01:48:52
8	Metabolic Syndrome OR Metabolic Diseases OR Diabetes OR Diabetes Mellitus OR T2DM OR Insulin Resistance OR Insulin Sensitivity OR Obesity OR Body Weight OR Overweight OR Body Mass Index OR BMI OR Cardio*	"metabolic syndrome"[MeSH Terms] OR ("metabolic"[All Fields] AND "syndrome"[All Fields]) OR "metabolic syndrome"[All Fields] OR ("metabolic diseases"[MeSH Terms] OR ("metabolic"[All Fields] AND "diseases"[All Fields]) OR "metabolic diseases"[All Fields]) OR ("diabete"[All Fields] OR "diabetes mellitus"[MeSH Terms] OR ("diabetes"[All Fields] AND "mellitus"[All Fields]) OR "diabetes mellitus"[All F…	5025394	01:48:11
7	iso C19:0 OR anteiso C19:0 OR 16-Methyloctadecanoic acid	("iso"[All Fields] AND "c19 0"[All Fields]) OR ("anteiso"[All Fields] AND "c19 0"[All Fields]) OR ("16-Methyloctadecanoic"[All Fields] AND ("acids"[MeSH Terms] OR "acids"[All Fields] OR "acid"[All Fields]))	2	01:38:05
6	iso C18:0 OR 16-Methylheptadecanoic acid OR anteiso C18:0	("iso"[All Fields] AND "c18 0"[All Fields]) OR ("16-Methylheptadecanoic"[All Fields] AND ("acids"[MeSH Terms] OR "acids"[All Fields] OR "acid"[All Fields])) OR ("anteisoC18"[All Fields] AND "0"[EC/RN Number])	148	01:37:54
5	iso C17:0 OR 15-Methylhexadecanoic acid OR anteiso C17:0 OR 14-Methylhexadecanoic acid	("iso"[All Fields] AND "c17 0"[All Fields]) OR ("15-Methylhexadecanoic"[All Fields] AND ("acids"[MeSH Terms] OR "acids"[All Fields] OR "acid"[All Fields])) OR ("anteiso"[All Fields] AND "c17 0"[All Fields]) OR ("14 methylhexadecanoic acid"[Supplementary Concept] OR "14 methylhexadecanoic acid"[All Fields] OR "14 methylhexadecanoic acid"[All Fields])	50	01:37:43
4	iso C16:0 OR 14-Methylpentadecanoic acid OR anteiso C16:0 OR 13-Methylpentadecanoic acid	("iso"[All Fields] AND "c16 0"[All Fields]) OR ("14-Methylpentadecanoic"[All Fields] AND ("acids"[MeSH Terms] OR "acids"[All Fields] OR "acid"[All Fields])) OR ("anteiso"[All Fields] AND "c16 0"[All Fields]) OR ("13-Methylpentadecanoic"[All Fields] AND ("acids"[MeSH Terms] OR "acids"[All Fields] OR "acid"[All Fields]))	1534	01:37:33
3	iso C15:0 OR 13-Methyltetradecanoic acid OR anteiso C15:0 OR 12-Methyltetradecanoic acid	("iso"[All Fields] AND "c15 0"[All Fields]) OR ("13 methyltetradecanoic acid"[Supplementary Concept] OR "13 methyltetradecanoic acid"[All Fields] OR "13 methyltetradecanoic acid"[All Fields]) OR ("anteiso"[All Fields] AND "c15 0"[All Fields]) OR ("aseanostatin p5"[Supplementary Concept] OR "aseanostatin p5"[All Fields] OR "12 methyltetradecanoic acid"[All Fields])	97	01:37:19
2	iso C14:0 OR 12-Methyltridecanoic acid OR anteiso C14:0 OR 11-Methyltridecanoic acid	("iso"[All Fields] AND "c14 0"[All Fields]) OR ("aseanostatin p1"[Supplementary Concept] OR "aseanostatin p1"[All Fields] OR "12 methyltridecanoic acid"[All Fields]) OR ("anteiso"[All Fields] AND "c14 0"[All Fields]) OR ("11-Methyltridecanoic"[All Fields] AND ("acids"[MeSH Terms] OR "acids"[All Fields] OR "acid"[All Fields]))	15	01:37:08
1	Branched chain fatty acid OR BCFA	(("branch"[All Fields] OR "branch s"[All Fields] OR "branche"[All Fields] OR "branched"[All Fields] OR "branches"[All Fields] OR "branching"[All Fields] OR "branchings"[All Fields] OR "branchs"[All Fields]) AND ("chain"[All Fields] OR "chain s"[All Fields] OR "chains"[All Fields]) AND ("fatty acids"[MeSH Terms] OR ("fatty"[All Fields] AND "acids"[All Fields]) OR "fatty acids"[All Fields] OR ("fat…	5181	01:36:50

## Sheet: Table S2
Table S2.Agency for Health Care Research and Quality (AHRQ) quality assessment summary
Author, year	Definition	Sample selection	Time period	Consecution	Subjective components	Assessments for quality assurance purposes	Any patient exclusions from analysis	Confounding	Missing data	Response rates and completeness	Follow-up	Scores/11	Quality
Xiong Su (2015)	1	1	0	1	1	1	1	0	1	1	0	8	high quality
Mika (2016)	1	1	0	1	1	1	1	0	1	1	0	8	high quality
RENATA BARCZYŃSKA (2018)	1	1	0	0	1	1	1	0	1	1	0	7	medium quality
Alicja Pakiet (2020)	1	1	1	1	1	1	1	0	1	0	0	9	high quality
David Rios-Covian (2020)	1	1	0	1	1	1	1	1	1	1	0	9	high quality
M.A. González Hernández (2021)	1	1	0	1	1	1	1	1	1	1	0	9	high quality
Alicja Pakiet (2021)	1	1	1	1	1	1	1	0	1	1	0	9	high quality

## Sheet: Table S3
Table S3.Newcastle-Ottawa Scale (NOS) quality assessment summary
Author, year	Selection				Comparability	Outcome			Scores/9	Quality
	Representativeness of the exposed cohort	Selection of the non exposed cohort	Ascertainment of exposure	Demonstration that outcome of interest was not present at start of study	Comparability	Assessment of outcome	Follow-up	Adequacy of follow up of cohorts
Xiong Su (2015)	⭐		⭐	⭐		⭐	⭐	⭐	6	medium quality
Per G Farup (2020)	⭐	⭐	⭐	⭐	⭐⭐	⭐	⭐		8	high quality
Zehra Esra Ilhan (2020)	⭐		⭐	⭐	⭐⭐	⭐	⭐	⭐	8	high quality
Alicja Pakiet (2020)	⭐		⭐	⭐		⭐	⭐		5	low quality
Alicja Pakiet (2021)	⭐		⭐	⭐		⭐	⭐		5	low quality

## Sheet: Table S4
Table S4. Elaboration of the biological properties of BCFAs.
Ref	Properties	Molecular Mechanisms
Kniazeva, et.al1; Zhu, et.al2	Regulating growth & development	1. Post-embryonic development：derivatives of BCFAs, d17iso-GlcCer, can enhance protein synthesis and stimulate individual development through high-intensity activation of the TORC1 pathway. 2. Neural development：BCFAs and its derivative d17iso-GlcCer regulate the differentiation or maturation of foraging-related sensory neurons by affecting the expression of transcription factors in neurons.
Maheshwari, et al3; Czumaj, et.al4	Regulation of lipid metabolism	BCFAs were negatively correlated with total TG content and could act as potent activators of PPARα and regulate the expression of genes related to lipid metabolism (FAS,SREBP1,SCD1).
Yan, et.al5 Ran-Ressler, et.al6	Anti-inflammatory properties	BCFAs effectively alleviate NEC in neonatal rats; Inhibition of TLR4-NF-κB inflammatory pathway activation by reducing TLR4 expression, thereby alleviating the inflammatory response induced by LPS.
Lin, et.al7 Wongtangtintharn, et.al8	Anti-cancer properties	1.Induction of apoptosis via caspase pathway: AKT phosphorylation, Bcl-2↓; MAPK/JNK and P38 phosphorylation, Bax↑; Triggering the mitochondrial apoptosis pathway (cyt C, caspase); 2. Independent of the Caspase pathway: Alters the transmembrane potential of mitochondria, nuclear translocation of AIF↑
*BCFAs: Branched chain fatty acids; TORC1: Target of rapamycin complex 1; TG: Triglyceride; PPARα：Peroxisome proliferator-activated receptor α; FAS: Fatty acid synthase; SREBP1: Sterol regulatory element-binding protein 1; SCD1: Stearoyl-CoA desaturase; NEC: Necrotizing enterocolitis; TLR4: Toll-like receptor 4; LPS: Lipopolysaccharide; AKT: Protein kinase B; Bcl-2: B-cell lymphoma-2; MAPK/JNK: M…
Ref: 1. M. Zhu, F. Teng, N. Li, L. Zhang, S. Zhang, F. Xu, J. Shao, H. Sun and H. Zhu, Monomethyl branched-chain fatty acid mediates amino acid sensing upstream of mTORC1, Dev Cell, 2021, 56, 2692-2702.e2695. 2. M. Kniazeva, H. H. Zhu, A. K. Sewell and M. Han, A Lipid-TORC1 Pathway Promotes Neuronal Development and Foraging Behavior under Both Fed and Fasted Conditions in C. elegans, Developmenta…
